# Supplementary material for: The Per2 Negative Feedback Loop Sets the Period in the Mammalian Circadian Clock Mechanism
Source: PLOS journal article supplement (doi:10.1371/journal.pcbi.0030242), 2007-12-10
Supplement: S1 (10.1371/journal.pcbi.0030242.s001) [file journal.pcbi.0030242.s001]

function Forger_Peskin_model
%Based on Forger and Pesking model as published in PNAS in 2003. Notation is taken
%from the supplemental material of this publication, and if discrepancies
%were discovered, from the Mathematica version of the model.
%This version is extended with a more detailed phosphorylation mechanism
%for Per2, as reported by Vanselow et al., (2006) in Genes Dev 20: 2660-2672)

%parameters from mathematica file - slightly different from Table one in
%PNAS!!!
%New/modified parameters are 15, 18, 39 and 40
k = [10.000007507426437; 1.0306113804294779; 2.533240595047462; 3.392174131760531; 0.08235038322223653; 0.09010086823641558; 0.43586075263171675; 0.5939301343988281; ...
%    tlp                tlr                 tlrv                up               upu                 hto                 uro                 urt  
%    1                  2                   3                   4                 5                   6                   7                   8         
  0.4650682485639215; 5.086549513975453; 0.26637517504990715; 0.35208765240076423; 2.3068625846024933; 0.7134369508630467; 6.0; 0.28622504147320627; 1.4532467336558366;  1.4532467336558366; ... 
%      ac                 dc                ar                  dr                  nl                  ne                 ho                 hoo               hot                 ht 
%      9                  10                11                  12                  13                  14                 15                 16                17                  18
     7.711599056047925; 1476.5235122841377; 23.77792431606627; 807.3899825274443; 308.75858766813644; 9.034446234019176; 7.661529362606101; 0.04596363025142135; 0.4203923725237006; ... 
%      Ct                 bin               unbin             trPo              trPt               trRo              trRt              trRv                tmc  
%      19                 20                21                  22              23                 24                25                26                  27 
     0.21037340452340514; 3.617835946402381; 0.13285836190972028; 21.7634595649439; 16.25382347888401; 6.210956900459175; 0.37665288989017; 0.298706036897769; 15.110143877673188; ... 
%      arv                 drv               binRv               unbinRv          uRv               umPo              umPt             umR                umRv
%      28                  29                30                  31               32                33                34               35                 36
     0.0;                 115.7612458072891;  0.08;      0.8];
%      Lon                     Nf            Per2pp_deg  Per2ppn_deg
%      37                      38            39          40


%Unlumping of the parameters
for i=1:231
      if (i<=38)	
        k_unlumped(i) = k(i);	
      end
      if (i>40 && i<=55)	
        k_unlumped(i) = k(4);	
      end
      if (i>55 && i<=58)	
        k_unlumped(i) = k(5);	
      end
      if (i>58 && i<=63)	
        k_unlumped(i) = k(6);	end
      if (i>65 && i<=90)	
        k_unlumped(i) = k(9);	end
      if (i>90 && i<=115)	
        k_unlumped(i) = k(10);	end
      if (i>115 && i<=146)	
        k_unlumped(i) = k(11);	end
      if (i>146 && i<=177)	
        k_unlumped(i) = k(12);	end
      if (i>177 && i<=190)
        k_unlumped(i) = k(13);	end
      if (i>190 && i<=215)	
        k_unlumped(i) = k(14);	end
      if (i>216 && i<=221)	
        k_unlumped(i) = k(18);	end
      if (i>221 && i<=225)	
        k_unlumped(i) = k(27);	end
      if (i>227 && i<=230)	
        k_unlumped(i) = k(32);	end
  end
  k_unlumped(39) = k(1);
  k_unlumped(40) = k(2);
  k_unlumped(64) = k(7);
  k_unlumped(65) = k(8);
  k_unlumped(216) = k(16);
  k_unlumped(226) = k(28);
  k_unlumped(227) = k(29);
  k_unlumped(231) = k(35);   
  k_unlumped(232) = k(15);
  k_unlumped(233) = k(15);
  k_unlumped(234) = k(15);
  k_unlumped(235) = k(15);
  k_unlumped(236) = k(39);
  k_unlumped(237) = k(39);
  k_unlumped(238) = k(40);
  k_unlumped(239) = k(40);   
  k_unlumped(240) = k(15);
  
  
%Initixl condition as found by solution of the boundary value problem with the above parameterization  
IC = [0.910330000000000   0.000000000000000   1.721300000000000   2.260600000000000   1.459700000000000   1.917000000000000   0.006808200000000...
      0.000442110000000   0.002603600000000   0.002142700000000   0.000057465000000   0.000001582500000   0.00000021531000    0.000000029011000...
      0.000000000000000   0.000000000000001   0.01381900000000    0.023735000000000   0.008717900000000   0.012313000000000   0.000254980000000...
      0.001454400000000   0.000142180000000   0.000708750000000   0.000044398000000   0.001505100000000   0.000415380000000   0.000792630000000...
      0.000240180000000   0.000477150000000   0.000592850000000   0.000350910000000   0.004800000000000   0.002522500000000   0.000062069000000...
      0.001355300000000   0.000351120000000   0.000628000000000   0.000202970000000   0.000378420000000   0.000410070000000   0.004948400000000...
      0.000242490000000   0.002596300000000   5.337600000000000   3.294700000000000   0.000245680000000   0.000646280000000   0.000131370000000...
      0.000357760000000   0.000012972000000   0.015082000000000   0.000713310000000   0.000824460000000   0.000401840000000   0.000475150000000...
      0.000044794000000   0.027446000000000   0.000024789000000   0.014178000000000   0.000006046000000   0.008010600000000   0.001303000000000...
      0.001335400000000   0.000733100000000   0.000766840000000   0.000093889000000   0.051430000000000   0.000052022000000   0.026559000000000...
      0.025366000000000   0.011704000000000   0.182210000000000];


T =  23.8266;

[t,x]=ode23s(@diff_eq,[0 T],IC,[],k_unlumped);

figure;
plot(t,x(:,45));

return

function dxdt=diff_eq(t,x,k)

  
C = k(19) - (x(19) + x(20) + x(21)+ x(22) + x(25) + x(26) + x(37) + x(38) + x(39) + x(40) + x(41) + x(42) + x(43) + x(44) + x(47) + x(48) + x(51) + x(52) + x(63) + x(64) + x(65) + x(66) + x(67) + x(68) + x(69) + x(70) + x(73));
 
Rn = x(63) + x(64) + x(65) + x(66) + x(67) + x(68) + x(69) + x(70) + x(71) + x(72) + x(53) + x(54) + x(55) + x(56) + x(57) + x(58) + x(59) + x(60);
%The annotation of species follows the original publication's notation
%exactly

%G
dxdt(1) =  k(20)*Rn*(1-x(1)) - k(21)*x(1);
%GRv
dxdt(2) =  k(30)*x(16)*(1-x(2)) - k(31)*x(2);
%MnRo
dxdt(3) =  k(24)*(1-x(1))*(1-x(2))^3 - k(27)*x(3);
%McRo
dxdt(4) =  k(27)*x(3) - k(35)*x(4);
%MnRt
dxdt(5) =  k(25)*(1-x(1)) - k(222)*x(5);
%McRt
dxdt(6) =  k(222)*x(5) - k(231)*x(6);
%MnPo
dxdt(7) =  k(22)*(1-x(1))^5 + k(37) - k(223)*x(7);
%McPo
dxdt(8) =  k(223)*x(7) - k(33)*x(8);
%MnPt
dxdt(9) =  k(23)*(1-x(1))^5 + k(37) - k(224)*x(9);
%McPt
dxdt(10)=  k(224)*x(9) - k(34)*x(10);
%MnRv
dxdt(11)=  k(26)*(1-x(1))^3- k(225)*x(11);
%McRv
dxdt(12)=  k(225)*x(11) - k(36)* x(12);
%Rv
dxdt(13)=  k(3)*x(12) - 2* k(28)*x(13)*x(13) + 2*k(29)*x(15) - k(13)*x(13)+ k(14)*x(14) - k(32)*x(13);
%Rvn
dxdt(14)=  - 2*k(38)*k(226)*x(14)*x(14) + 2*k(227)*x(16) + k(13)*x(13) - k(14)*x(14) - k(228)*x(14);
%RvRv
dxdt(15)=  k(28)*x(13)*x(13) -  k(29)*x(15) - k(178)*x(15) + k(191)*x(16) -2* k(229)*x(15);
%RvnRvn
dxdt(16)=  k(38)* k(226)*x(14)*x(14) -  k(227)*x(16) + k(178)*x(15) - k(191)*x(16) - 2* k(230)*x(16);
%Po
dxdt(17)=   k(1)*x(8) - k(9)*x(17)*C + k(10)*x(19) - k(5)*x(17);
%Pt
dxdt(18)=  k(39)*x(10) - k(66)*x(18)*C + k(91)*x(20) - k(56)*x(18);
%PoC
dxdt(19)=  k(9)*x(17)*C - k(10)*x(19) - k(16)*x(19) - k(57)*x(19);
%PtC
dxdt(20)=  k(66)*x(18)*C - k(91)*x(20) - k(17)*x(20) - k(58)*x(20);
%PopC
dxdt(21)=  k(16)*x(19) + k(67)*x(23)*C - k(92)*x(21) - k(4)*x(21) - k(6)*x(21)  - k(179)*x(21) + k(192)*x(47) - k(11)*x(21)*x(45) + k(154)*x(37) - k(116)*x(21)*x(46) + k(156)*x(39);
%PtpC
dxdt(22)=  k(17)*x(20) + k(68)*x(24)*C - k(93)*x(22) - k(41)*x(22) - k(18)*x(22) - k(180)*x(22) + k(193)*x(48) - k(117)*x(22)*x(45) + k(155)*x(38) - k(118)*x(22)*x(46) + k(157)*x(40);
%Pop
dxdt(23)= -k(67)*x(23)*C + k(92)*x(21) - k(42)*x(23) - k(119)*x(23)*x(45) + k(12)*x(27) - k(120)*x(23)*x(46) + k(148)*x(29) - k(181)*x(23) + k(194)*x(49);
%Ptp
dxdt(24)= -k(68)*x(24)*C + k(93)*x(22) - k(43)*x(24) - k(121)*x(24)*x(45) + k(147)*x(28) - k(122)*x(24)*x(46) + k(149)*x(30) - k(182)*x(24) + k(195)*x(50);
%PoppC
dxdt(25)=  k(6)*x(21) - k(44)*x(25) + k(77)*x(35)*C -k(94)*x(25) + k(196)*x(51)- k(123)*x(25)*x(45) + k(158)*x(41) - k(124)*x(25)*x(46) + k(160)*x(43);
%PtppC
dxdt(26)=  k(18)*x(22) - k(236)*x(26) + k(78)*x(36)*C -k(95)*x(26) + k(197)*x(52)- k(125)*x(26)*x(45) + k(159)*x(42) - k(126)*x(26)*x(46) + k(161)*x(44)-k(15)*x(26); 
%PopRo
dxdt(27)= k(119)*x(23)*x(45) - k(12)*x(27) -k(69)*x(27)*C + k(96)*x(37) - k(183)*x(27) + k(198)*x(53);
%PtpRo
dxdt(28)= k(121)*x(24)*x(45) - k(147)*x(28) -k(70)*x(28)*C + k(97)*x(38) - k(184)*x(28) + k(199)*x(54);
%PopRt
dxdt(29)= k(120)*x(23)*x(46) - k(148)*x(29) -k(71)*x(29)*C + k(98)*x(39) - k(185)*x(29) + k(200)*x(55);
%PtpRt
dxdt(30)= k(122)*x(24)*x(46) - k(149)*x(30) -k(72)*x(30)*C + k(99)*x(40) - k(186)*x(30) + k(201)*x(56);
%PoppRo
dxdt(31)= k(127)*x(35)*x(45) - k(150)*x(31) -k(73)*x(31)*C + k(100)*x(41) + k(202)*x(57);
%PoppRt
dxdt(32)= k(128)*x(35)*x(46) - k(151)*x(32) -k(74)*x(32)*C + k(102)*x(43) + k(204)*x(59);
%PtppRo
dxdt(33)= k(129)*x(36)*x(45) - k(152)*x(33) -k(75)*x(33)*C + k(101)*x(42) + k(203)*x(58)-k(232)*x(33);
%PtppRt
dxdt(34)= k(130)*x(36)*x(46) - k(153)*x(34) -k(76)*x(34)*C + k(103)*x(44) + k(205)*x(60)-k(233)*x(34);
%Popp
dxdt(35) = - k(77)*x(35)*C + k(94)*x(25) + k(206)*x(61) - k(127)*x(35)*x(45) + k(150)*x(31) - k(128)*x(35)*x(46) + k(151)*x(32) - k(46)*x(35);
%Ptpp
dxdt(36) = - k(78)*x(36)*C + k(95)*x(26) + k(207)*x(62) - k(129)*x(36)*x(45) + k(152)*x(33) - k(130)*x(36)*x(46) + k(153)*x(34) - k(237)*x(36) -k(234)*x(36);
%PopCRo
dxdt(37) = k(11)*x(21)*x(45) - k(154)*x(37) + k(69)*x(27)*C - k(96)*x(37) - k(187)*x(37) + k(208)*x(63) - k(59)*x(37);
%PtpCRo
dxdt(38) = k(117)*x(22)*x(45) - k(155)*x(38) + k(70)*x(28)*C - k(97)*x(38) - k(188)*x(38) + k(209)*x(64) - k(217)*x(38);
%PopCRt
dxdt(39) = k(116)*x(21)*x(46) - k(156)*x(39) + k(71)*x(29)*C - k(98)*x(39) - k(189)*x(39) + k(210)*x(65) - k(60)*x(39);
%PtpCRt
dxdt(40) = k(118)*x(22)*x(46) - k(157)*x(40) + k(72)*x(30)*C - k(99)*x(40) - k(190)*x(40) + k(211)*x(66) - k(218)*x(40);
%PoppCRo
dxdt(41) = k(123)*x(25)*x(45) - k(158)*x(41) + k(73)*x(31)*C - k(100)*x(41) + k(212)*x(67) + k(59)*x(37);
%PtppCRo
dxdt(42) = k(125)*x(26)*x(45) - k(159)*x(42) + k(75)*x(33)*C - k(101)*x(42) + k(213)*x(68) + k(217)*x(38)-k(235)*x(42);
%PoppCRt
dxdt(43) = k(124)*x(25)*x(46) - k(160)*x(43) + k(74)*x(32)*C - k(102)*x(43) + k(214)*x(69) + k(60)*x(39);
%PtppCRt
dxdt(44) = k(126)*x(26)*x(46) - k(161)*x(44) + k(76)*x(34)*C - k(103)*x(44) + k(215)*x(70) + k(218)*x(40)-k(240)*x(44);
%Ro
dxdt(45) = - k(119)*x(45)*x(23) - k(127)*x(45)*x(35) - k(11)*x(45)*x(21) - k(123)*x(45)*x(25) + k(12)*x(27) + k(150)*x(31) + k(154)*x(37) + k(158)*x(41) - k(121)*x(45)*x(24) - k(129)*x(45)*x(36) - k(117)*x(45)*x(22) - k(125)*x(45)*x(26) + k(147)*x(28) + k(152)*x(33) + k(155)*x(38) + k(159)*x(42) +  k(2)*x(4) - k(7)*x(45);
%Rt
dxdt(46) = - k(120)*x(46)*x(23) - k(128)*x(46)*x(35) - k(116)*x(46)*x(21) - k(124)*x(46)*x(25) + k(148)*x(29) + k(151)*x(32) + k(156)*x(39) + k(160)*x(43) - k(122)*x(46)*x(24) - k(130)*x(46)*x(36) - k(118)*x(46)*x(22) - k(126)*x(46)*x(26) + k(149)*x(30) + k(153)*x(34) + k(157)*x(40) + k(161)*x(44) +  k(40)*x(6) - k(8)*x(46); 
%PonpCn
dxdt(47) = k(79)* k(38)*x(49)*x(73) - k(104)*x(47) - k(216)*x(47) + k(179)*x(21) - k(192)*x(47) - k(131)* k(38)*x(47)*x(71) + k(170)*x(63) - k(132)* k(38)*x(47)*x(72) + k(172)*x(65) - k(48)*x(47);
%PtnpCn
dxdt(48) = k(80)* k(38)*x(50)*x(73) - k(105)*x(48) - k(219)*x(48) + k(180)*x(22) - k(193)*x(48) - k(133)* k(38)*x(48)*x(71) + k(171)*x(64) - k(134)* k(38)*x(48)*x(72) + k(173)*x(66) - k(49)*x(48);
%Ponp
dxdt(49) = - k(79)* k(38)*x(49)*x(73) + k(104)*x(47) - k(135)* k(38)*x(49)*x(71) + k(162)*x(53) - k(136)* k(38)*x(49)*x(72) + k(164)*x(55) + k(181)*x(23) - k(194)*x(49) - k(50)*x(49);
%Ptnp
dxdt(50) = - k(80)* k(38)*x(50)*x(73) + k(105)*x(48) - k(137)* k(38)*x(50)*x(71) + k(163)*x(54) - k(138)* k(38)*x(50)*x(72) + k(165)*x(56) + k(182)*x(24) - k(195)*x(50) - k(51)*x(50);
%PonppCn
dxdt(51) =   k(61)*x(47) + k(89)* k(38)*x(61)*x(73) - k(106)*x(51) - k(196)*x(51) - k(139)* k(38)*x(51)*x(71) + k(174)*x(67) - k(140)* k(38)*x(51)*x(72) + k(176)*x(69) - k(52)*x(51);
%PtnppCn
dxdt(52) =  k(219)*x(48) + k(90)* k(38)*x(62)*x(73) - k(107)*x(52) - k(197)*x(52) - k(141)* k(38)*x(52)*x(71) + k(175)*x(68) - k(142)* k(38)*x(52)*x(72) + k(177)*x(70) - k(238)*x(52)+k(15)*x(26);
%PonpRon
dxdt(53) = k(135)* k(38)*x(49)*x(71) - k(162)*x(53) - k(81)* k(38)*x(53)*x(73) + k(108)*x(63) + k(183)*x(27) - k(198)*x(53);
%PtnpRon
dxdt(54) = k(137)* k(38)*x(50)*x(71) - k(163)*x(54) - k(82)* k(38)*x(54)*x(73) + k(109)*x(64) + k(184)*x(28) - k(199)*x(54);
%PonpRtn
dxdt(55) = k(136)* k(38)*x(49)*x(72) - k(164)*x(55) - k(83)* k(38)*x(55)*x(73) + k(110)*x(65) + k(185)*x(29) - k(200)*x(55);
%PtnpRtn
dxdt(56) = k(138)* k(38)*x(50)*x(72) - k(165)*x(56) - k(84)* k(38)*x(56)*x(73) + k(111)*x(66) + k(186)*x(30) - k(201)*x(56);
%PonppRon
dxdt(57) = k(143)* k(38)*x(61)*x(71) - k(166)*x(57) - k(85)* k(38)*x(57)*x(73) + k(112)*x(67) - k(202)*x(57);
%PtnppRtn
dxdt(58) = k(145)* k(38)*x(62)*x(71) - k(167)*x(58) - k(86)* k(38)*x(58)*x(73) + k(113)*x(68) - k(203)*x(58) + k(232)*x(33);
%PonppRtn
dxdt(59) = k(144)* k(38)*x(61)*x(72) - k(168)*x(59) - k(87)* k(38)*x(59)*x(73) + k(114)*x(69) - k(204)*x(59);
%PtnppRtn
dxdt(60) = k(146)* k(38)*x(62)*x(72) - k(169)*x(60) - k(88)* k(38)*x(60)*x(73) + k(115)*x(70) - k(205)*x(60) +k(233)*x(34);
%Ponpp
dxdt(61) = - k(89)* k(38)*x(61)*x(73) + k(106)*x(51) - k(206)*x(61) - k(143)* k(38)*x(61)*x(71) + k(166)*x(57) - k(144)* k(38)*x(61)*x(72) + k(168)*x(59) - k(54)*x(61);
%Ptnpp
dxdt(62) = - k(90)* k(38)*x(62)*x(73) + k(107)*x(52) - k(207)*x(62) - k(145)* k(38)*x(62)*x(71) + k(167)*x(58) - k(146)* k(38)*x(62)*x(72) + k(169)*x(60) - k(239)*x(62) + k(234)*x(36);
%PonpCnRon
dxdt(63) =  k(131)* k(38)*x(47)*x(71) - k(170)*x(63) + k(81)* k(38)*x(53)*x(73) - k(108)*x(63) + k(187)*x(37) - k(208)*x(63) - k(62)*x(63);
%PtnpCnRon
dxdt(64) =  k(133)* k(38)*x(48)*x(71) - k(171)*x(64) + k(82)* k(38)*x(54)*x(73) - k(109)*x(64) + k(188)*x(38) - k(209)*x(64) - k(220)*x(64);
%PonpCnRtn
dxdt(65) =  k(132)* k(38)*x(47)*x(72) - k(172)*x(65) + k(83)* k(38)*x(55)*x(73) - k(110)*x(65) + k(189)*x(39) - k(210)*x(65) - k(63)*x(65);
%PtnpCnRtn
dxdt(66) =  k(134)* k(38)*x(48)*x(72) - k(173)*x(66) + k(84)* k(38)*x(56)*x(73) - k(111)*x(66) + k(190)*x(40) - k(211)*x(66) - k(221)*x(66);
%PonppCnRon
dxdt(67) =  k(139)* k(38)*x(51)*x(71) - k(174)*x(67) + k(85)* k(38)*x(57)*x(73) - k(112)*x(67) - k(212)*x(67) + k(62)*x(63);
%PtnppCnRon
dxdt(68) =  k(141)* k(38)*x(52)*x(71) - k(175)*x(68) + k(86)* k(38)*x(58)*x(73) - k(113)*x(68) - k(213)*x(68) + k(220)*x(64) + k(235)*x(42);
%PonppCnRtn
dxdt(69) =  k(140)* k(38)*x(51)*x(72) - k(176)*x(69) + k(87)* k(38)*x(59)*x(73) - k(114)*x(69) - k(214)*x(69) + k(63)*x(65);
%PtnppCnRtn
dxdt(70) =  k(142)* k(38)*x(52)*x(72) - k(177)*x(70) + k(88)* k(38)*x(60)*x(73) - k(115)*x(70) - k(215)*x(70) + k(221)*x(66) + k(240)*x(44);
%Ron
dxdt(71) = - k(135)* k(38)*x(71)*x(49) - k(143)* k(38)*x(71)*x(61) - k(131)* k(38)*x(71)*x(47) - k(139)* k(38)*x(71)*x(51) + k(162)*x(53) + k(166)*x(57) + k(170)*x(63) + k(174)*x(67) - k(137)* k(38)*x(71)*x(50) - k(145)* k(38)*x(71)*x(62) - k(133)* k(38)*x(71)*x(48) - k(141)* k(38)*x(71)*x(52) + k(163)*x(54) + k(167)*x(58) + k(171)*x(64) + k(175)*x(68) - k(64)*x(71);
%Rtn
dxdt(72) = - k(136)* k(38)*x(72)*x(49) - k(144)* k(38)*x(72)*x(61) - k(132)* k(38)*x(72)*x(47) - k(140)* k(38)*x(72)*x(51) + k(164)*x(55) + k(168)*x(59) + k(172)*x(65) + k(176)*x(69) - k(138)* k(38)*x(72)*x(50) - k(146)* k(38)*x(72)*x(62) - k(134)* k(38)*x(72)*x(48) - k(142)* k(38)*x(72)*x(52) + k(165)*x(56) + k(169)*x(60) + k(173)*x(66) + k(177)*x(70) - k(65)*x(72);
%Cn
dxdt(73) = - k(79)* k(38)*x(73)*x(49)  -  k(89)* k(38)*x(73)*x(61) -  k(81)* k(38)*x(73)*x(53) - k(85)* k(38)*x(73)*x(57)  + k(104)*x(47) + k(106)*x(51) + k(108)*x(63) + k(112)*x(67) - k(80)* k(38)*x(73)*x(50) - k(90)* k(38)*x(73)*x(62) - k(82)* k(38)*x(73)*x(54) - k(86)* k(38)*x(73)*x(58) + k(105)*x(48) + k(107)*x(52) + k(109)*x(64) + k(113)*x(68) - k(83)* k(38)*x(73)*x(55) - k(87)* k(38)*x(73)*x(59) + k(110)*x(65) + k(114)*x(69) - k(84)* k(38)*x(73)*x(56) - k(88)* k(38)*x(73)*x(60) + k(111)*x(66) + k(115)*x(70) + k(48)*x(47) + k(52)*x(51) + k(49)*x(48) + k(238)*x(52);

dxdt=dxdt';
return
